For submission to Gene Expression Patterns

Spatial and temporal expression of PORCN is highly dynamic in the developing mouse cochlea.

Brianna L. Oliver<sup>1\*</sup>, Caryl A. Young<sup>1,2\*</sup>, Vidhya Munnamalai<sup>1,2</sup>

\*Equal contribution

#### Affiliations

<sup>1</sup> The Jackson Laboratory, Bar Harbor, Maine 04609

<sup>2</sup> The University of Maine, Graduate School of Biomedical Sciences and Engineering, Orono, Maine 04469

Correspondence should be addressed to:

Vidhya Munnamalai, Ph.D.

The Jackson Laboratory

600 Main St., Bar Harbor, ME 04609

Ph- 207 288 6916

[vidhya.munnamalai@jax.org](mailto:vidhya.munnamalai@jax.org)

Funding: NIH R21DC016376 and The Jackson Laboratory start-up funds (to VM)

Running Title: Wnt secretion in the cochlea

Key words - Cochlea, Wnt, Porcupine, GSK3 $\beta$

Declarations of interest: none

## Highlights

- Wnt ligands are broadly expressed during cochlear development.
- PORCN is restricted to the medial domains in early developmental stages.
- Wnt medial specification is regulated at the ligand level by PORCN-mediated WNT secretion.

## Abstract

The mammalian organ of Corti is a highly specialized sensory organ of the cochlea with fine-grained pattern that is essential for auditory function. Previous studies show that the Wnt pathway regulates proliferation, promotes medial compartment formation in the cochlea, differentiation of the mechanosensory hair cells and axon guidance of Type II afferent neurons. WNT ligand expressions are highly dynamic throughout development but are insufficient to explain the roles of the Wnt pathway. We address a potential way for how WNTs specify the medial compartment by characterizing the expression of Porcupine (PORCN), an O-acyltransferase that palmitoylates WNT ligands for secretion. We show PORCN expression across embryonic ages (E)12.5 - E14.5, E16.5, and postnatal day (P)1. Our results showed enriched PORCN in the medial domains during early stages of development, indicating that WNTs have a stronger influence on patterning of the medial compartment. PORCN was rapidly downregulated after E14.5, following the onset of sensory cell differentiation; residual expression remained in some hair cells and supporting cells. On E14.5 and E16.5, we also examined the spatial expression of *Gsk3 $\beta$* , an inhibitor of canonical Wnt signaling to determine its potential role in radial patterning of the cochlea. *Gsk3 $\beta$*  was broadly expressed across the radial axis of the epithelium; therefore, unlikely to control WNT-mediated medial specification. In conclusion, the spatial expression of PORCN enriches WNT secretion from the medial domains of the cochlea to influence the specification of cell fates in the medial sensory domain.

## 1. Introduction

The mammalian cochlea is a coiled, intricately patterned sensory organ informed by positional information during development. The organ of Corti (OC) houses mechanosensory hair cells (HCs), which convert mechanical energy from sound waves into auditory neural signals that are transmitted to the brain. There is a dichotomy within the OC with two domains: the medial sensory (MS) domain containing one row of inner hair cells (IHCs) that detect sound and the lateral sensory (LS) domain containing three rows of outer hair cells (OHCs) that amplify sound (Fig. 1). The inside of the coiled cochlea facing the modiolus, or the central axis of the cochlea, is referred to the medial side of the cochlea. The longitudinal axis communicates frequency selectivity, while the radial axis specifies neural processing by afferent and efferent projections. HC differentiation occurs in a base to apex direction beginning on approximately embryonic day (E)15 in the mouse cochlea [1]. Morphogen gradients endow cells in the cochlear epithelium with positional information to determine cell fate choices, giving rise to the complex organization of the cochlea [2]. One major morphogen signaling pathway that establishes positional information in the cochlea is the Wnt pathway [3].

The Wnt pathway is known to regulate proliferation, differentiation, planar cell polarity,  $\text{Ca}^{2+}$  signaling and axon guidance of type II neurons in the cochlea [3-8]. In the canonical pathway secreted WNTs bind to frizzled receptors, inhibiting GSK3 $\beta$ . This allows  $\beta$ -Catenin to translocate into the nucleus and bind TCF/LEF transcription factors, activating gene transcription. Previous studies demonstrate canonical Wnt activity in the prosensory domain of the E12.5 cochlea [9]. At this stage, canonical Wnt signaling is important for regulating the proliferation of progenitors in the prosensory domain [9, 10] and radial patterning [11, 12]. There are four *Wnts* expressed in the cochlea: *Wnt4*, *Wnt5a*, *Wnt7a*, and *Wnt7b* [5, 10, 13]. However, *Wnt5a*, *Wnt7a*, and *Wnt7b* are expressed on the floor of the duct. Evidence suggests that Wnt activity regulates *Atoh1* expression [10, 12, 14]. However, previous studies show Wnt pathway activation promotes an expansion of the domain that houses IHCs and tall hair cells (THC) in the mouse and chicken cochleas respectively [10, 15]. How this specificity is attained is unknown.

In order to identify a potential avenue for how the Wnt pathway specifies the medial compartment in the cochlea, we present a comparative study of *Wnt ligand* expression, PORCN, and the Wnt inhibitor, GSK3 $\beta$  at different stages of cochlear development. We show that the spatial and temporal expression pattern of the PORCN enzyme alone, supports a mechanism for

Wnt specification of medial fates in the developing cochlea.

## 2. Results

In order to understand how the Wnt pathways specifies the medial domain, we sought to characterize and compare the expression of *Wnts* to the expression of Porcupine (PORCN) in the cochlea. We examined the spatial expression of known *Wnts* present in the cochlea on E12.5, E14.5 and E16.5, by *in situ* hybridization for *Wnt7b*, *Wnt7a*, and *Wnt5a* (Fig. 2). On E12.5, *Wnt7b* was broadly expressed across the radial axis with a slight enrichment along the lateral edge of the cochlea, towards the outer sulcus (Fig. 2A). By E14.5, *Wnt7b* was homogeneously expressed in the medial and lateral compartments (Fig. 2B); however, *Wnt7b* was drastically downregulated by E16.5 (Fig. 2C). On E12.5, *Wnt7a* was broadly expressed at very low levels (Fig. 2D). On E14.5, *Wnt7a* was broadly expressed across the radial axis (Fig. 2E). By E16.5, *Wnt7a* was downregulated in the cochlea, especially in the OHC region (Fig. 2F). On E12.5, *Wnt5a* was expressed on the medial side and the lateral edge of the cochlea. By E14.5 *Wnt5a* expression was further defined in the medial sensory side and the lateral non-sensory side of the cochlea that precedes the *stria vascularis* (Fig. 2G, H) [5]. On E16.5, *Wnt5a* expression remained in the inner sulcus, but was down regulated in MYO7A-positive HCs (Fig. 2I, arrowheads). Transcripts for all three *Wnt ligands* were spatially downregulated in the LS domain, (Fig. 2C, F, I).

Given the spatiotemporal expression patterns of *Wnts* in the cochlea, we expected PORCN to be expressed in all corresponding domains to facilitate WNT secretion. Therefore, we sought to determine the spatial expression of PORCN by immunolabeling. To test the specificity of the anti-PORCN antibody, we generated E14.5 *Isl1Cre; Porcn; Tdt* conditional knockout (*cKO*) embryos. TD-Tomato (TDT) expression reported the efficiency of Cre recombination under *Isl1Cre* expression. JAG1, a known Wnt target gene [16] and PORCN were immunolabeled in both control and *Porcn cKO* cochlea (Fig. 3). In control *Isl1Cre<sup>+/-</sup>; Porcn (X<sup>fllox</sup> X<sup>+</sup>); Tdt<sup>+/-</sup>* cochleas, PORCN was medially enriched (Fig. 3A). In *Isl1Cre<sup>+/-</sup>; Porcn (X<sup>fllox</sup> Y); Tdt<sup>+/-</sup> cKO* cochleas, PORCN immunolabeling was abolished (Fig. 3B). Consistent with the conditional deletion of *Porcn*, TDT expression showed that Cre recombination occurred across the floor of the duct (Fig. 3C, D). This validated the specificity of the anti-PORCN antibody. In control cochleas, JAG1 was expressed medially within the PORCN domain (Fig. 3A, E). The

global loss of WNT ligands in *Porcn cKO* cochleas completely abolished JAG1 (Fig. 3F). This validated both the anti-PORCN antibody and the *Porcn cKO* mouse model.

We then characterized the spatio-temporal expression of PORCN relative to SOX2, which labels the prosensory domain or support cells, on E12.5- E14.5 (Fig. 4), and on E16.5 and postnatal day (P)1 (Fig. 5). On E12.5, PORCN was broadly expressed across the radial axis and enriched centrally in the floor of the duct, adjacent to the medial SOX2 domain (Fig. 4A). On E13.5, PORCN expression sweeps from base to apex along the longitudinal axis. SOX2 expression was highest in the base similar to E12.5 and reduced towards the apex (Fig. 4B). In the mid-turn (t2), the SOX2-positive prosensory domain was shifted centrally with low levels of PORCN on the medial edge. In the apical turn (t3), PORCN was not yet expressed (Fig. 4B, B'). On E14.5, PORCN expression remained broad in the basal turn (t1) (Fig. 4C); however, in the mid-turn, t2 PORCN was significantly confined to the medial domain adjacent to SOX2 (Fig. 4D). PORCN expression was lowest in t3 but enriched in the medial region adjacent to the SOX2 domain (Fig. 4E). Thus, PORCN expression was consistently broad in the basal turns from E12.5- E14.5. However, further along the longitudinal axis, PORCN became restricted medially adjacent to the sensory domain. Although there was a base to apex sweep, the spatial expression of PORCN was always restricted to the medial side in the mid and apical turns of the cochlea.

Compared to E14.5, PORCN was dramatically reduced on the medial side by E16.5 (Fig. 5). In t1 and t2 there was very low levels of PORCN in the IHC and its neighboring supporting cell (Fig. 5A, B, B'). Unlike E14.5, there was no PORCN expression in the far medial domain adjacent to SOX2 (Fig. 5A, B). In t3, enriched PORCN expression remained in the medial compartment, but there was low level PORCN expression within the SOX2 domain (Fig. 5C). On E16.5, the PORCN expression pattern in the apical turn, t4, was similar to the E14.5 mid-turn, t2 with an enrichment in the medial domain adjacent to the SOX2 domain (Fig. 4D, 5D). Towards the apex, PORCN expression never extended across the radial axis (Fig. 4D, 4E, 5D), unlike the basal turns from E12.5-E14.5 (Fig. 4A, B, C). By P1, PORCN was drastically reduced along the entire longitudinal axis (Fig. 5E-H). In t1 and t2, PORCN was observed on the basolateral side of the IHCs, and in the Deiters' and Hensens' cells (Fig. 5E, F, F'). Towards the apex, PORCN was barely detectable (Fig. 5G, H).

In previous studies, pharmacological activation of the Wnt pathway using a GSK3 $\beta$  inhibitor, CHIR99021 (CHIR), promoted the formation of the medial sensory domain that houses

the IHCs on approximately E13.5-E14.5 [10]. In order to determine whether GSK3 $\beta$ , which is further downstream of PORCN, influences Wnt-mediated medial specification on E14.5, we examined the spatial expression of GSK3 $\beta$  across the radial axis. *In situ* hybridization for *Gsk3 $\beta$*  transcripts on E14.5 showed that *Gsk3 $\beta$*  was ubiquitously expressed across the epithelium (Fig. 6A). On E16.5, *Gsk3 $\beta$*  was slightly downregulated in the sensory domain (Fig. 6B). Immunolabeling of E14.5 cochleas for GSK3 $\beta$ , supports our *in-situ* hybridizations showing homogenous expression across the radial axis at the same age (Fig. 6A, C). To validate the specificity of the anti-GSK3 $\beta$  antibody, we immunolabeled for GSK3 $\beta$  in E14.5 *Isl1Cre; Gsk3 $\beta$  cKOs* cochleas (Fig. 6D). GSK3 $\beta$  expression was completely absent in *Gsk3 $\beta$  cKOs* cochleas and the spiral ganglion (SGN), accompanied by a slightly expanded SOX2 domain on E14.5, compared to controls (Fig 6C, C' D, D') as previously described [10]. This validated the specificity of the anti-GSK3 $\beta$  antibody and confirmed that on E14.5, GSK3 $\beta$  is homogeneously expressed across the radial axis.

### 3. Discussion

In the developing cochlea, the Wnt pathway plays dual roles, i.e., the regulation of cell cycle proliferation and differentiation [4]. Four *Wnt ligands* are known to be expressed at significant levels in the cochlea: *Wnt4* [13], *Wnt5a* [5], *Wnt7a* [4] and *Wnt7b* [10, 13]. In both chicken and mouse cochleas, over-activation of Wnt signaling at the ligand level and by GSK3 $\beta$  inhibition showed that Wnt activation promotes the medial, or neural compartment that gives rise to IHCs [10, 15]. This specificity is surprising given the cumulative expression patterns of WNT ligands. During the early developmental stages between E12.5-E14.5, there is a WNT that is secreted from any given region of the cochlea. What determines the specificity of this medial identity in the cochlea?

Immunolabeling for PORCN during the early developmental stages between E12.5 and E14.5 showed a broad but consistent expression towards the basal end of the cochlea that was restricted to the medial domains towards the apex (Fig. 4). On E16.5 the PORCN expression seems meaningless for WNT secretion as there appears to be no *Wnt-ligand* expression within IHCs. A recent study characterized the expression of *Porcn* by *in situ* hybridization to have very low expression on E16.5, with a slightly higher, albeit still low, expression on the lateral side of the cochlea in the apex [17]. However, the probe used, detected the *Porcn-a* isoform only, while

there are four different isoforms for *Porcn* in total [18]. A BlastP analysis for the anti-PORCN antibody used in this study against its synthetic peptide sequence: ACRLWRLGLPSYKHAHV AGGFFSLYHF FQLHVMVWVVL LSLLCYLVLVLF showed that it recognizes at least the A, B and C isoforms; thus, validation of the antibody in a *Porcn* *cKO* was important. Our RNA sequencing performed on E14.5 cochleas did not show that the D isoform was expressed (data not shown). Future studies would benefit from identifying the spatial expression of all the isoforms that are expressed in the cochlea.

The difference in expression patterns along the longitudinal axis suggests a possible role for regulating tonotopy, leaving open the pursuit of an intriguing future direction. Along the radial axis, particularly in the mid and apical turns, we saw an enrichment of PORCN in the medial domain adjacent to the SOX2-positive sensory domain (Fig 4D, E). This observation supports a stronger role for Wnt signaling in promoting medial fates over lateral fates, particularly up to E14.5 while the medial domain is specified. There was a drastic downregulation of PORCN in the medial domain of the cochlea after E15/ E16.5, particularly on the base-end of the cochlea (Fig. 5A, E-H). Thus, Wnt signaling is significantly downregulated after E15 in a normal context. Towards the apex, however, PORCN expression was reminiscent of earlier stages of development on E14.5 (Fig. 5C, D). This suggests that once sensory cells have initiated differentiation, WNT secretion is downregulated. Interestingly, PORCN expression was retained in the IHCs, Deiters' cells and Hensen's cells (Fig. 5B', F'). Although Wnt activation increases *Fgf8*-positive IHCs [10], and THC fates [15], loss-of-function Wnt mutant studies do not clearly address whether Wnt signaling is required for HC-type specification. One explanation could be the inability to finely titrate the timing of abolishing Wnt function in transgenic animals.

To address whether GSK3 $\beta$ , which is downstream of WNT ligands, influences radial identity in either a Wnt-dependent or independent manner, we characterized its spatial expression on E14.5 and E16.5. On E14.5, the homogenous expressions of GSK3 $\beta$  protein and *Gsk3 $\beta$*  transcripts across the radial axis suggest that there is no radial influence for GSK3 $\beta$  signaling on E14.5 and that Wnt-mediated medial compartment specification in the cochlea is indeed regulated at the ligand level by PORCN by E14.5. On E16.5, there was a slight decrease of *Gsk3 $\beta$*  in the region medial to the IHCs (Fig. 6B). However, by E16.5, the IHCs have already been specified, so WNT secretion to specify medial compartment cell fates isn't required. *Gsk3 $\beta$*



was expressed in the extreme medial and lateral edges, coincident with a drastic downregulation of PORCN in the medial compartment, which further supports that canonical Wnt signaling is ‘turned off’ in the medial domains. However, there is a potential for PORCN secretion; hence Wnt activity to be present in the sensory domain and for GSK3 $\beta$  to influence Wnt-independent kinase signaling in a radial manner on E16.5. In conclusion, the spatial expression of PORCN provides some level of control for Wnt pathway specification of the medial domains in the developing mammalian cochlea.

#### 4. Methods

##### Mice

*B6.119(Cg)-Gsk3 $\beta$ <sup>tm2Jrm</sup>/J (Gsk3 $\beta$ <sup>flox</sup>)* [19] mice (The Jackson Laboratory, JAX, Bar Harbor, Maine, USA) and *Porcn<sup>flox</sup>* [20] mice (Charles Murtaugh, University of Utah) were used to generate cKOs. *Porcn<sup>flox</sup>* mice were crossed with *B6.Cg-Gt(ROSA)26Sor<sup>tm14(CAG-tdTomato)Hze</sup>/J* [21] (JAX) reporter mice to generate double-floxed *Porcn<sup>flox</sup>; Tdt<sup>flox</sup>* mice. *Porcn<sup>flox</sup>* mice, or *Gsk3 $\beta$ <sup>flox</sup>* were crossed with *Isl1<sup>tm1(Cre)Sev</sup>/J (Isl1Cre)* mice [22] (JAX). The first day a plug was observed, was designated as E0.5. E14.5 embryos were harvested and fixed in 4% PFA for processing. Swiss Webster (SW) dams (Envigo, Indiana, USA) were time-mated and embryos, or pups were euthanized on E12.5, E14.5, E16.5 and P1. All animal procedures were performed in accordance with the Institutional Animal Care and Use Committee (IACUC) guidelines at The Jackson Laboratory.

##### Histology

Embryos were decapitated and fixed overnight with 4% paraformaldehyde (PFA) (Electron Microscopy Sciences, Hatfield Pennsylvania, USA), and immersed in a series of 10%, 20%, and 30% sucrose solutions at 4 °C. Heads were embedded with Tissue Freezing Medium (TFM) (General Data Healthcare, Cincinnati, Ohio, USA) and cryo-frozen in liquid N<sub>2</sub>. Tissues were stored at -80°C and cryo-sectioned for immunofluorescence and *in situ* hybridization.

##### Immunofluorescence

Cryo-sectioned tissues were blocked with 2% Donkey serum (Jackson ImmunoResearch, West Grove, Pennsylvania, USA), followed by overnight primary antibody incubation at 4 °C. Primary

antibodies used: rabbit  $\alpha$ -PORCN (Invitrogen, Waltham, Massachusetts, USA, PA5-43423), goat  $\alpha$ -SOX2 (R&D Systems, Minneapolis, Minnesota, USA, AF2018), rabbit  $\alpha$ -GSK3 $\beta$  (Cell Signaling, Danvers, Massachusetts, USA, 12456S).  $\alpha$ -GSK3 $\beta$  antibody was previously used in a GSK3 $\beta$  study [23]. GSK3 $\beta$  antibody requires an antigen retrieval step. Tissues were incubated in a 10 mM sodium citrate buffer with 0.05 % Tween 20 (pH of 6) (Fisher Scientific) for 15 minutes at 99 °C prior to fixation. Secondary antibody incubation was performed with Alexa-conjugated antibodies (Life Technologies Corporation, Eugene, Oregon, USA). Tissue was mounted with Fluoromount G mounting medium (Life Technologies Corporation).

### ***In situ* hybridization**

Cryo-sectioned tissue was fixed with 4% PFA at room temperature for one hour followed by H<sub>2</sub>O<sub>2</sub> treatment and antigen retrieval (Advanced Cell Diagnostics, Newark, California, USA) at 99 °C for 5 minutes. Probes used: *Wnt5a* (ACD, 316791), *Wnt7a* (ACD, 401121), *Wnt7b* (ACD, 401131), and *Gsk3 $\beta$*  (ACD, 458821). The protocol was followed according to the manufacturer's instructions. When co-immunolabeling for HCs, after *in situ* hybridization, anti-MYO7A antibody, followed by secondary antibody incubations were performed following regular a immunofluorescence protocol.

### **Microscopy**

Images were acquired at 20X and 40X magnifications on a Zeiss LSM800 confocal microscope at The Jackson Laboratory Microscopy Core and a brightfield/ epifluorescence Olympus BX51 microscope with a Spot insight CMOS camera in the Munnamalai lab. Image stacks were analyzed on FIJI and images were processed in Adobe Photoshop and Illustrator.

### **Acknowledgements**

The authors gratefully acknowledge the contribution of the Microscopy Core at The Jackson Laboratory to generate the work described in this publication. The authors also thank Dr. Holly Beaulac for critical reading of this manuscript. This work was supported from R21DC016376 and start-up funds from The Jackson Laboratory to VM.



## References

1. Kelley, M.W., *Hair cell development: commitment through differentiation*. Brain Res, 2006. **1091**(1): p. 172-85.
2. Munnamalai, V. and D.M. Fekete, *The acquisition of positional information across the radial axis of the cochlea*. Dev Dyn, 2020. **249**(3): p. 281-297.
3. Munnamalai, V. and D.M. Fekete, *Wnt signaling during cochlear development*. Semin Cell Dev Biol, 2013. **24**(5): p. 480-9.
4. Dabdoub, A., et al., *Wnt signaling mediates reorientation of outer hair cell stereociliary bundles in the mammalian cochlea*. Development, 2003. **130**(11): p. 2375-84.
5. Qian, D., et al., *Wnt5a functions in planar cell polarity regulation in mice*. Dev Biol, 2007. **306**(1): p. 121-33.
6. Macheda, M.L., et al., *The Wnt receptor Ryk plays a role in mammalian planar cell polarity signaling*. J Biol Chem, 2012. **287**(35): p. 29312-23.
7. Landin Malt, A., et al., *Wnts regulate planar cell polarity via heterotrimeric G protein and PI3K signaling*. J Cell Biol, 2020. **219**(10).
8. Ghimire, S.R. and M.R. Deans, *Frizzled3 and Frizzled6 Cooperate with Vangl2 to Direct Cochlear Innervation by Type II Spiral Ganglion Neurons*. J Neurosci, 2019. **39**(41): p. 8013-8023.
9. Jacques, B.E., et al., *A dual function for canonical Wnt/beta-catenin signaling in the developing mammalian cochlea*. Development, 2012. **139**(23): p. 4395-404.
10. Munnamalai, V. and D.M. Fekete, *Notch-Wnt-Bmp crosstalk regulates radial patterning in the mouse cochlea in a spatiotemporal manner*. Development, 2016. **143**(21): p. 4003-4015.
11. Jansson, L., et al., *beta-Catenin is required for radial cell patterning and identity in the developing mouse cochlea*. Proc Natl Acad Sci U S A, 2019. **116**(42): p. 21054-21060.
12. Shi, F., et al., *beta-Catenin is required for hair-cell differentiation in the cochlea*. J Neurosci, 2014. **34**(19): p. 6470-9.
13. Bohnenpoll, T., et al., *Canonical Wnt signaling regulates the proliferative expansion and differentiation of fibrocytes in the murine inner ear*. Dev Biol, 2014. **391**(1): p. 54-65.
14. Shi, F., et al., *Beta-catenin up-regulates Atoh1 expression in neural progenitor cells by interaction with an Atoh1 3' enhancer*. J Biol Chem, 2010. **285**(1): p. 392-400.
15. Munnamalai, V., et al., *Wnt9a Can Influence Cell Fates and Neural Connectivity across the Radial Axis of the Developing Cochlea*. J Neurosci, 2017. **37**(37): p. 8975-8988.
16. Estrach, S., et al., *Jagged 1 is a beta-catenin target gene required for ectopic hair follicle formation in adult epidermis*. Development, 2006. **133**(22): p. 4427-38.
17. Najarro, E.H., et al., *Dual regulation of planar polarization by secreted Wnts and Vangl2 in the developing mouse cochlea*. Development, 2020. **147**(19).
18. Proffitt, K.D. and D.M. Virshup, *Precise regulation of porcupine activity is required for physiological Wnt signaling*. J Biol Chem, 2012. **287**(41): p. 34167-78.
19. Patel, S., et al., *Tissue-specific role of glycogen synthase kinase 3beta in glucose homeostasis and insulin action*. Mol Cell Biol, 2008. **28**(20): p. 6314-28.
20. Barrott, J.J., et al., *Deletion of mouse Porcn blocks Wnt ligand secretion and reveals an ectodermal etiology of human focal dermal hypoplasia/Goltz syndrome*. Proc Natl Acad Sci U S A, 2011. **108**(31): p. 12752-7.
21. Madisen, L., et al., *A robust and high-throughput Cre reporting and characterization system for the whole mouse brain*. Nat Neurosci, 2010. **13**(1): p. 133-40.

22. Yang, L., et al., *Isl1Cre reveals a common Bmp pathway in heart and limb development*. *Development*, 2006. **133**(8): p. 1575-85.
23. Ellis, K., et al., *GSK3 regulates hair cell fate in the developing mammalian cochlea*. *Dev Biol*, 2019. **453**(2): p. 191-205.

## Legends

Figure 1: Organization of the Cochlea.

(A) Phalloidin (red) labeling reveals the overall structure of the Scala media that houses the organ of Corti. SOX2 (light blue) labels the sensory domain and MYO7A labels the mechanosensory hair cells (green) in of the cochlea. (B) Cartoon depicting the domains on the floor of the cochlear duct. The inner hair cells and their support cells lie within the medial sensory (MS) domain and the outer hair cells and their support cells lie within the lateral sensory domain (LS). The organ of Corti is flanked by the inner sulcus (IS) and the outer sulcus (OS).

Figure 2: Cochlear expression of *Wnt* ligands on E12.5, E14.5 and E16.5.

(A-C) *Wnt7b* was broadly expressed on E12.5 but decreased during developmental progression on E14.5 and E16.5. (D-F) *Wnt7a* expression gradually increased from E12.5 to E16.5. (G-I) *Wnt5a* expression was restricted to the medial edge and lateral non-sensory sides of the cochlea and increased from E12.5 to E16.5. (I) Inset- MYO7A-positive HCs are labeled in dark blue. Light blue arrowhead labels in IHCs, and black arrowhead labels the OHCs. Cochleas in figures are oriented such that the medial side of the cochlea is placed on the left side and the lateral side of the cochlea is placed on the right. Sample size of cochleas range from n = 4 to n = 6.

Figure 3: Validation of the anti-PORCN antibody on E14.5 in *Isl1Cre; Porcn cKO* cochlea.

(A) PORCN was enriched in the medial domain. (B) PORCN expression was abolished in *Porcn* cKO cochlea. (C-D) TDT expression reported efficient Cre recombination on the floor of the duct. (E) Expression of the Wnt target JAG1 overlapped with PORCN expression in the medial domain. (F) JAG1 expression was abolished in *Porcn* cKO cochlea. n = 8 cochleas.

Figure 4: PORCN expression on E12.5, E13.5 and E14.5 relative to the SOX2 sensory domain.

(A) On E12.5, PORCN expression (green) was broad in the basal turn of the cochlea. (B, B') On E13.5, PORCN swept in a basal-to-apical gradient. (C-E) On E14.5, PORCN expression was highest in the base across the radial axis, but then became restricted to the medial domain towards the apex. (A-E) SOX2 expression (magenta). Sample size of cochleas range from n = 3 to n = 10.

Figure 5: PORCN expression on E16.5 and P1 relative to the SOX2 sensory domain.

(A-D) On E16.5, PORCN (green) expression remained in the sensory domain in the base but was restricted to the medial domain towards the apex. (B') Inset shows that PORCN was enriched in the domain containing the IHCs. (E-H) On P1, PORCN expression was drastically decreased in the cochlea. (F') Inset shows PORCN expression was retained in the IHCs, Deiters' cells and Hensen's cells. (A-H) SOX2 expression (magenta). (B', F') SOX2 expression (red), DAPI (blue). Sample size of cochleas range from n = 3 to n = 4.

Figure 6: GSK3 $\beta$  cochlear expression on E14.5 and E16.5.

(A) *In situ* hybridization for *Gsk3 $\beta$*  on E14.5 showed ubiquitous expression in the cochlea. (B) On E16.5, *Gsk3 $\beta$*  was enriched on the medial sensory and lateral non-sensory domains. MYO7A-positive HCs are labeled in dark blue. Light blue arrowhead labels in IHCs, and black arrowhead labels the OHCs. (C) On E14.5, GSK3 $\beta$  was ubiquitously expressed in the cochlea similar to *Gsk3 $\beta$*  transcript expression on E14.5, the surrounding mesenchyme and the spiral ganglion (SGN). (D) Anti-GSK3 $\beta$  immunolabeling was absent in *Isl1Cre; Gsk3 $\beta$  cKO* cochlea and the SGN, validating the anti-GSK3 $\beta$  antibody. (C'-D') Immunolabeling of the SOX2 sensory domain in control and *Gsk3 $\beta$  cKO* cochlea for comparison. Sample size of cochleas range from n = 4 to n = 6.

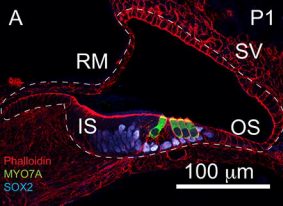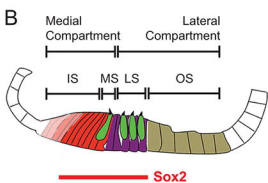



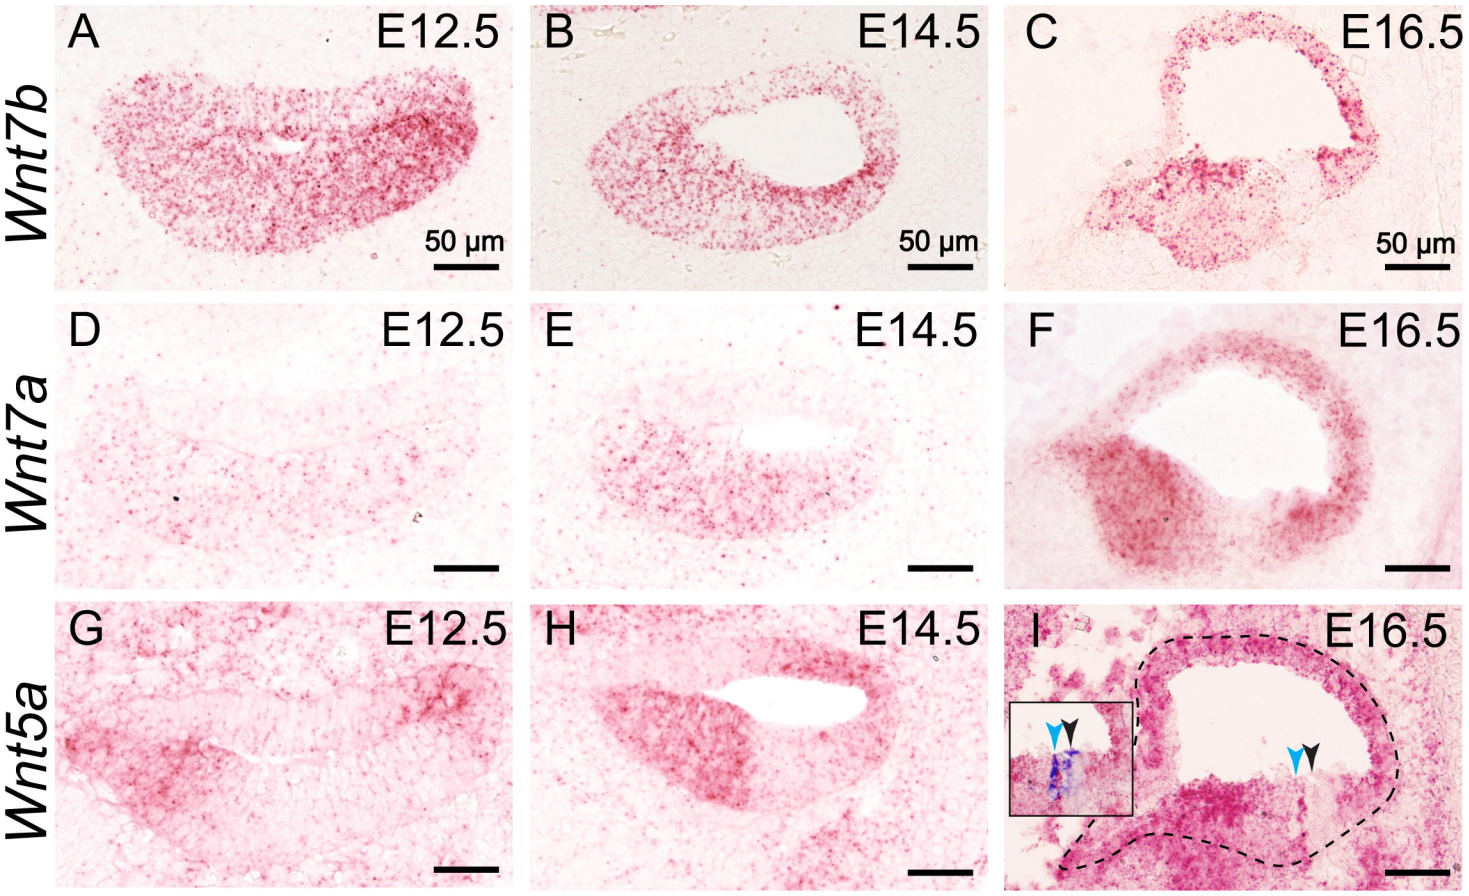

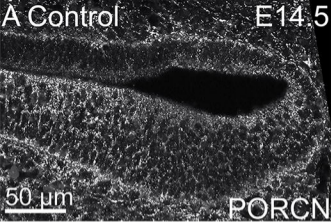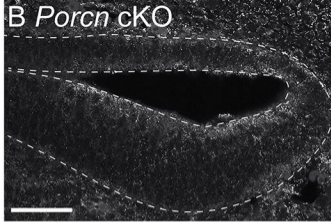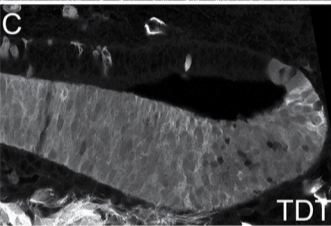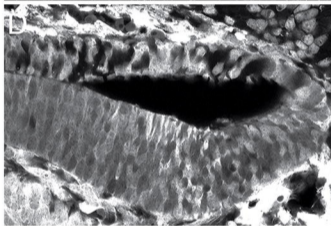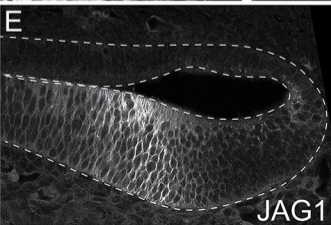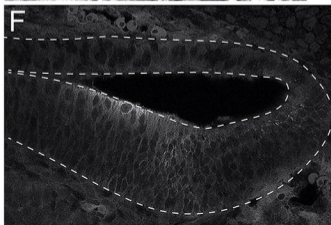

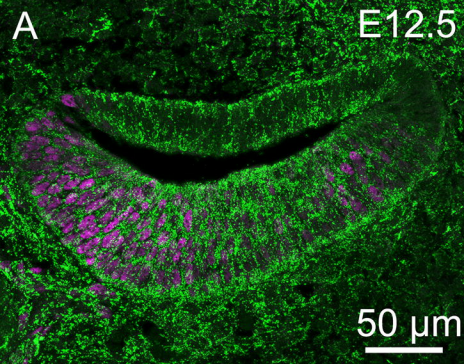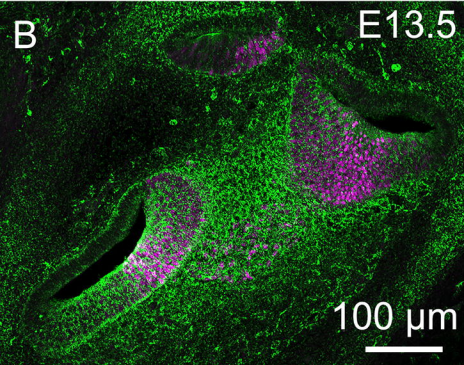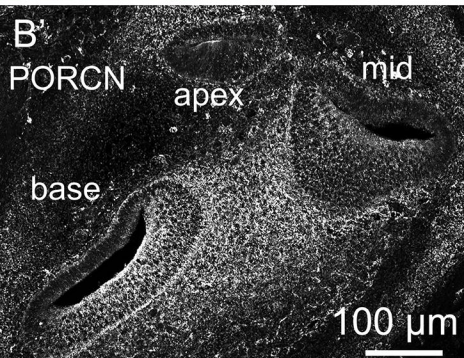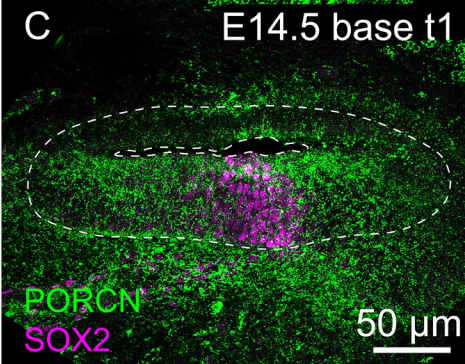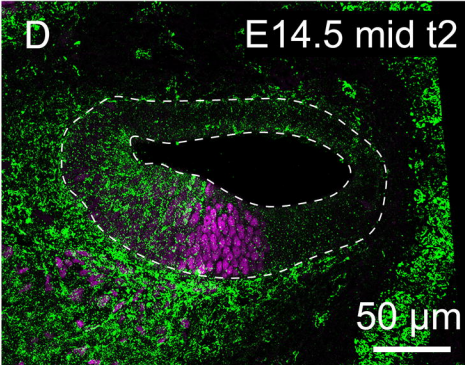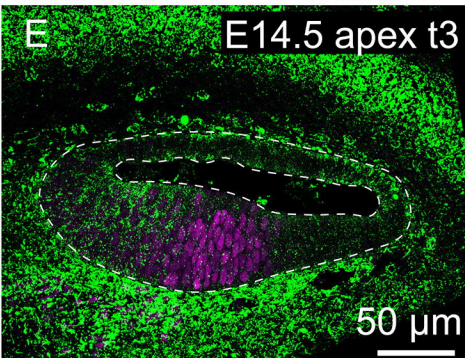

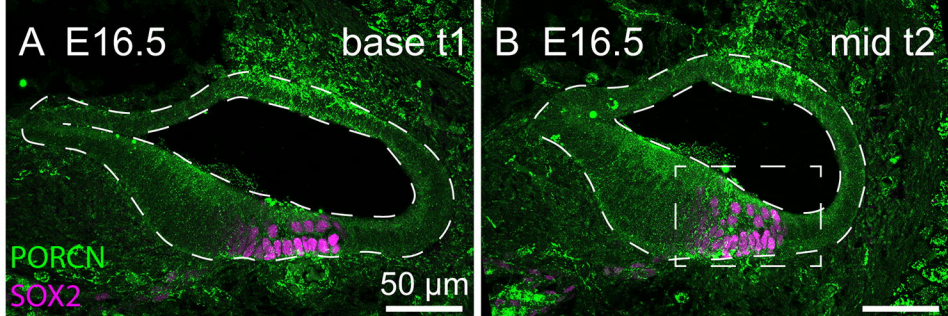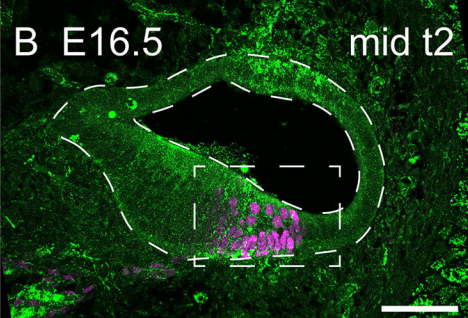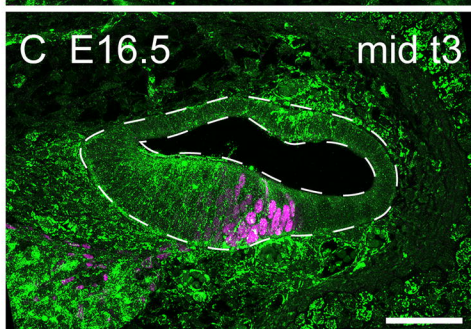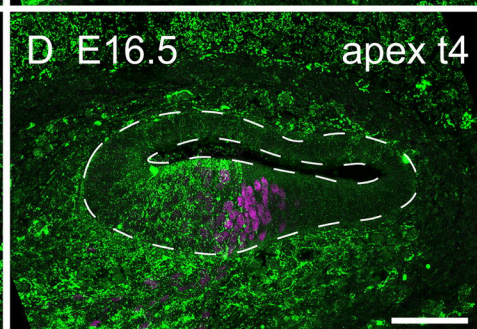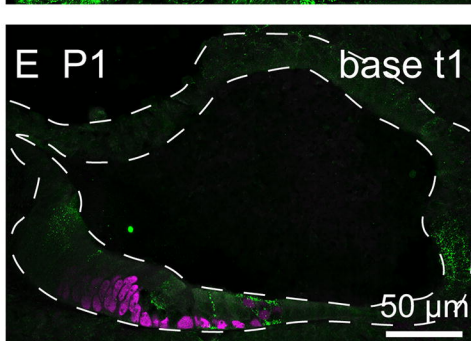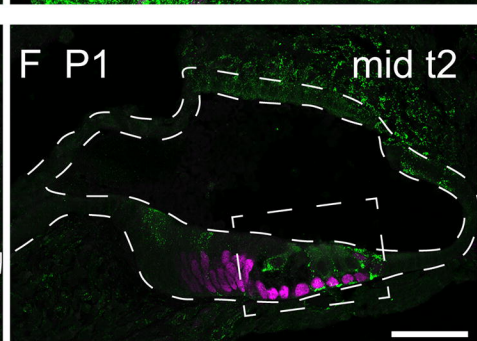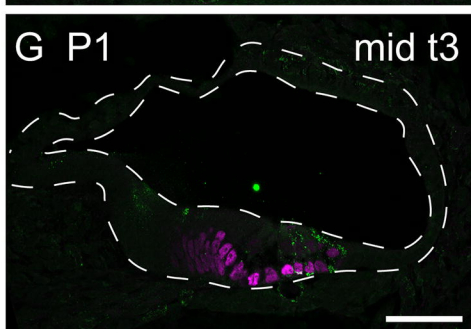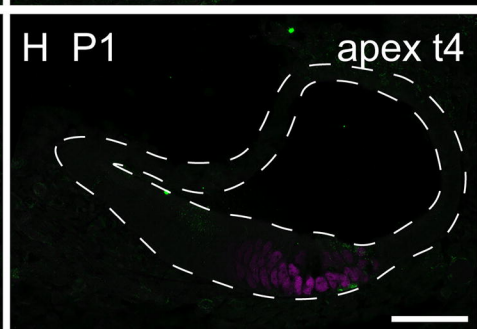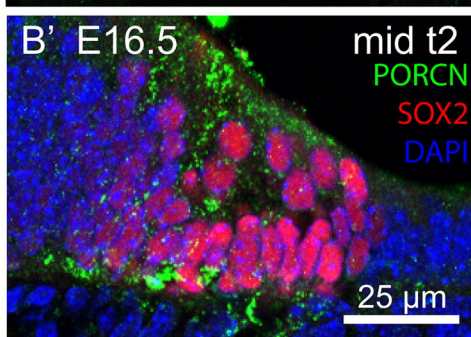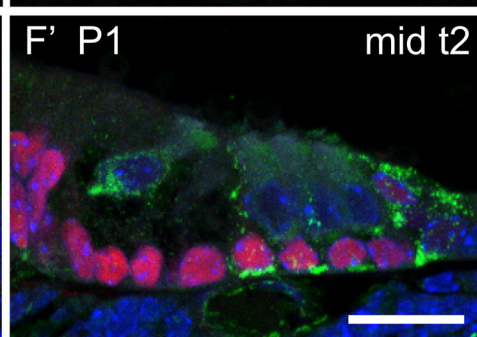

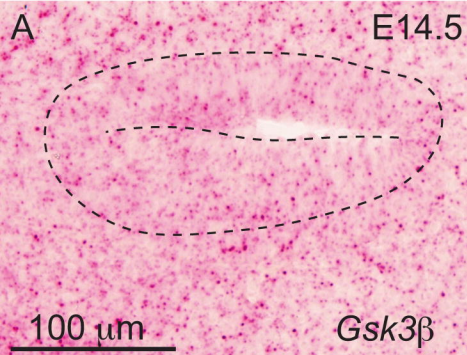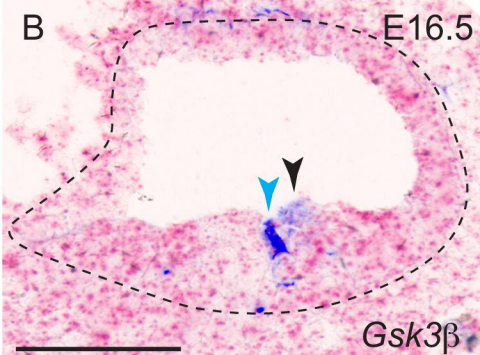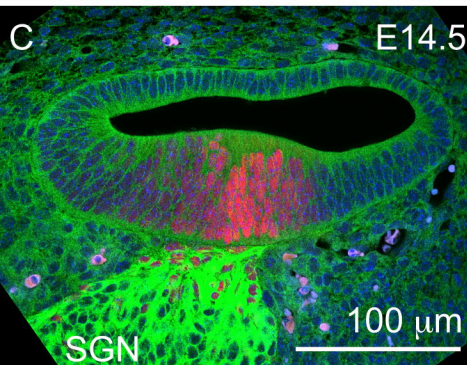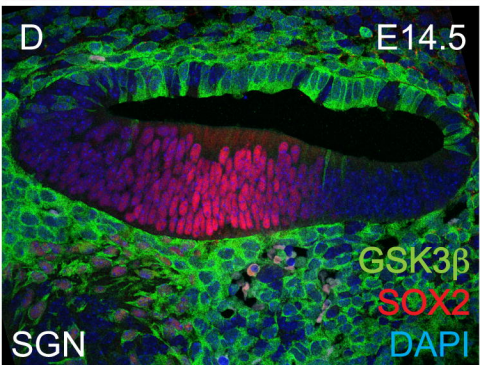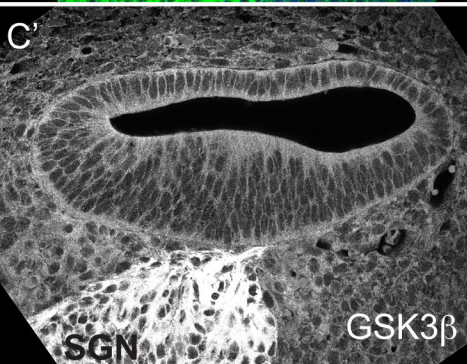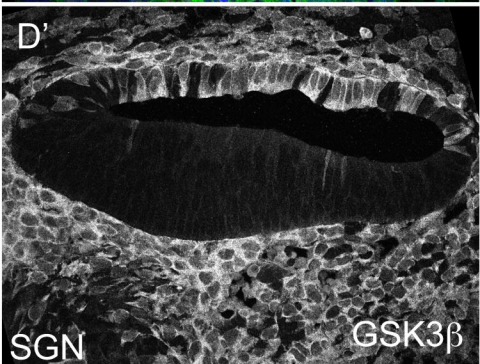

Source: http://biorxiv.org/content/10.1101/2021.08.20.456516v1.full.pdf
